# Supplementary material
Source: Springer Nature journal article supplement (https://www.springermedizin.de/resource/supplementary/12889_2011_3331_MOESM3_ESM.pdf/9488846)

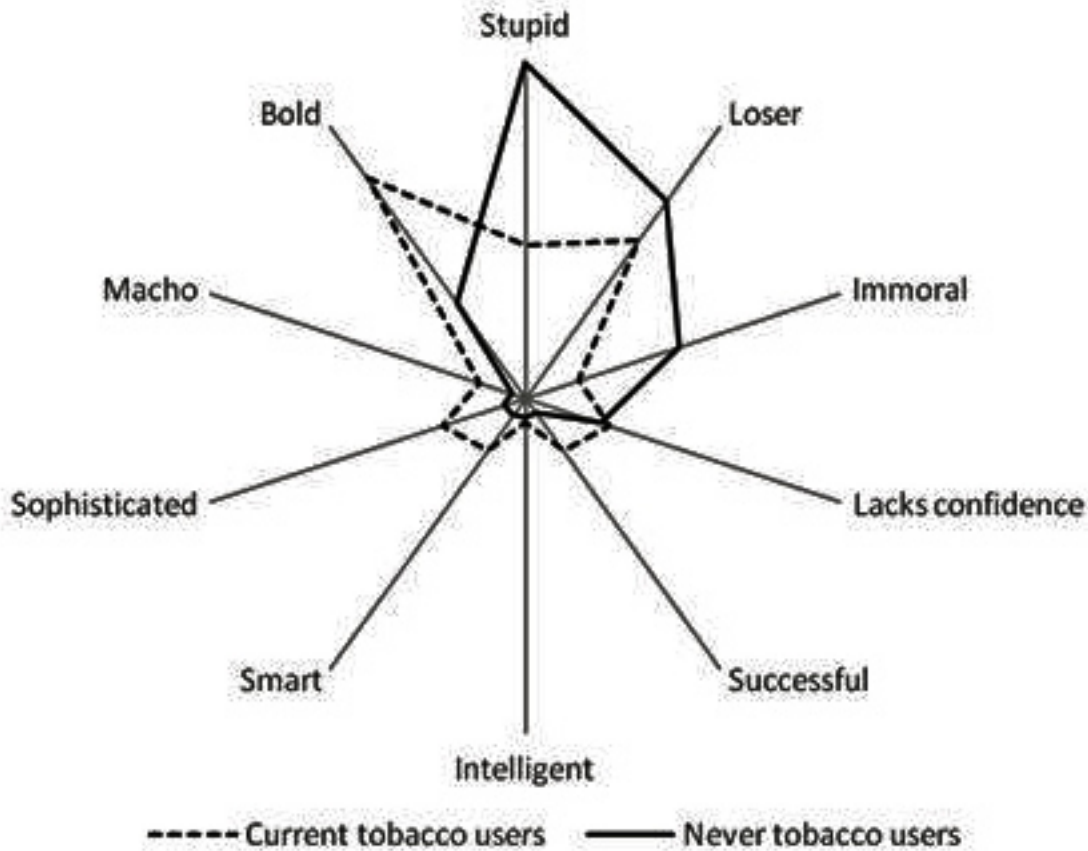

Supplement: MOESM3 [file 9488846]
